# Supplementary material
Source: publisher figshare collection journal article supplement (https://geolsoc.figshare.com/articles/dataset/_/3453800)

# S1: Photomicrographs

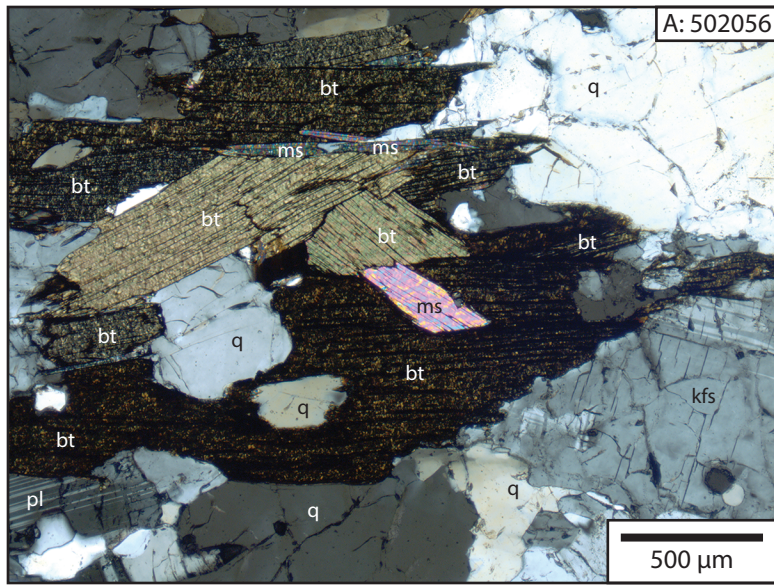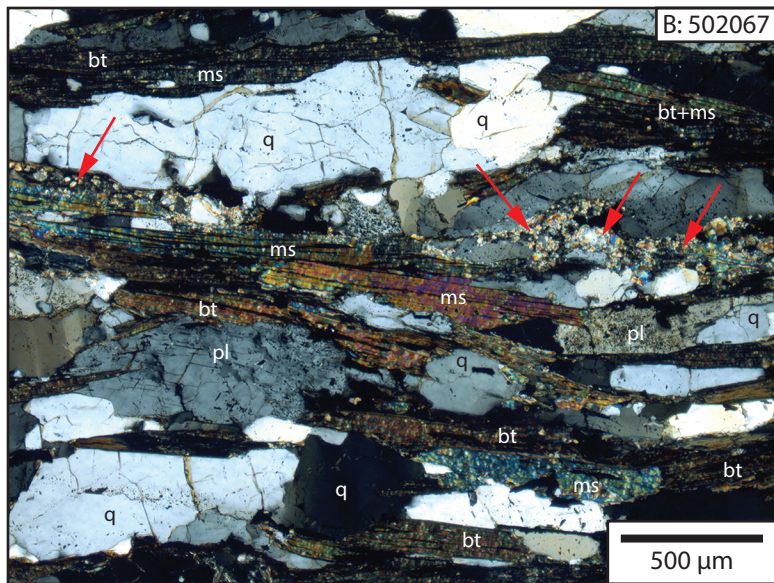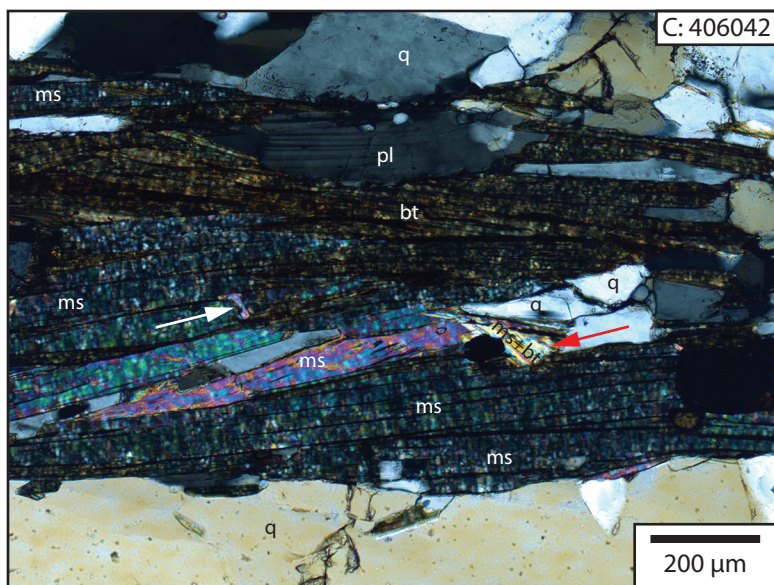

# S2: 502056 muscovite

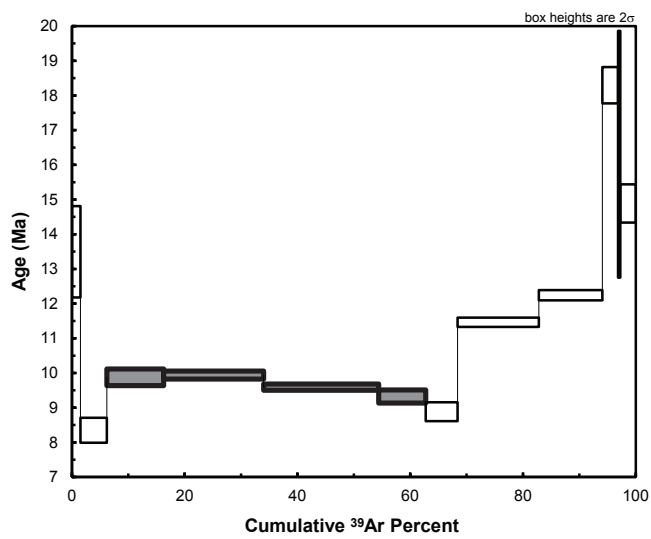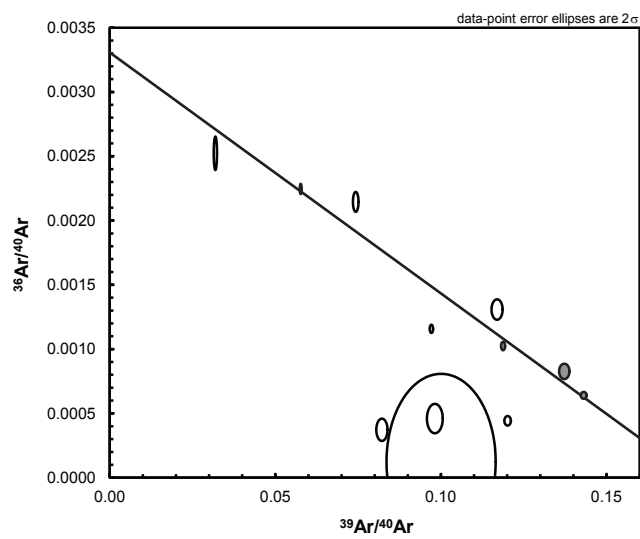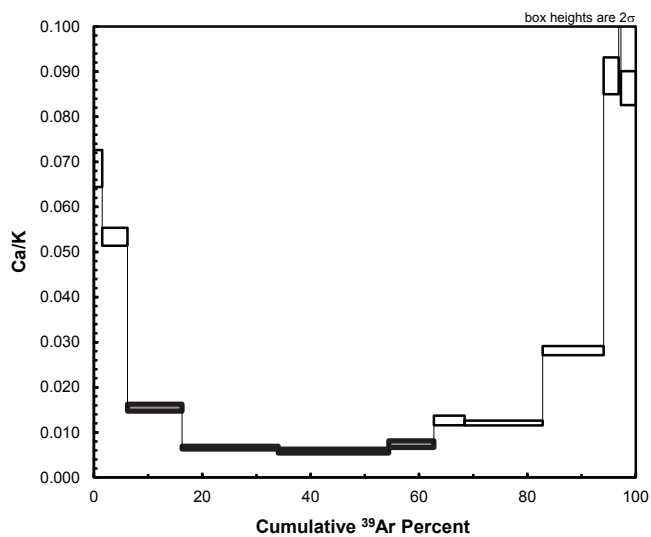

Steps shaded gray were used for age determinations.

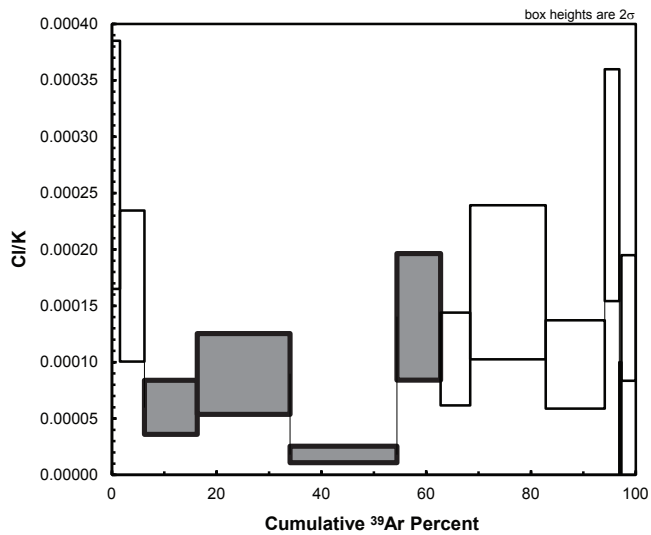

### S3: 502050 muscovite

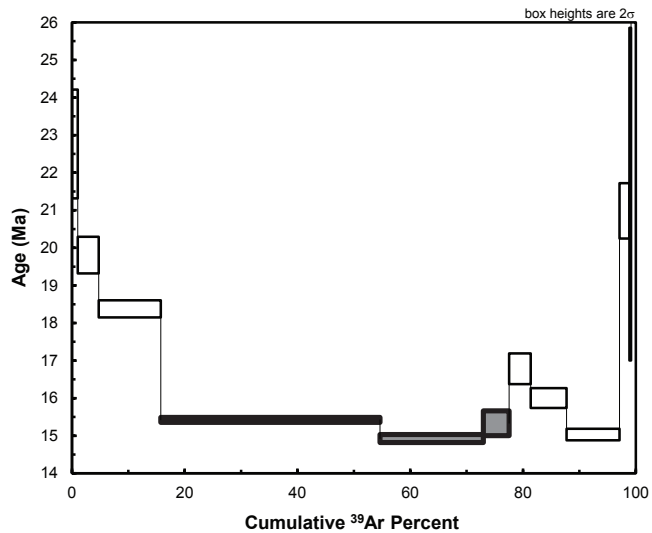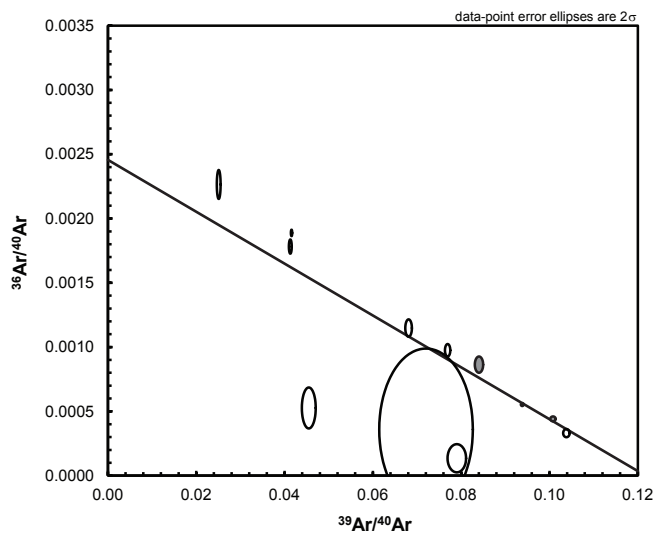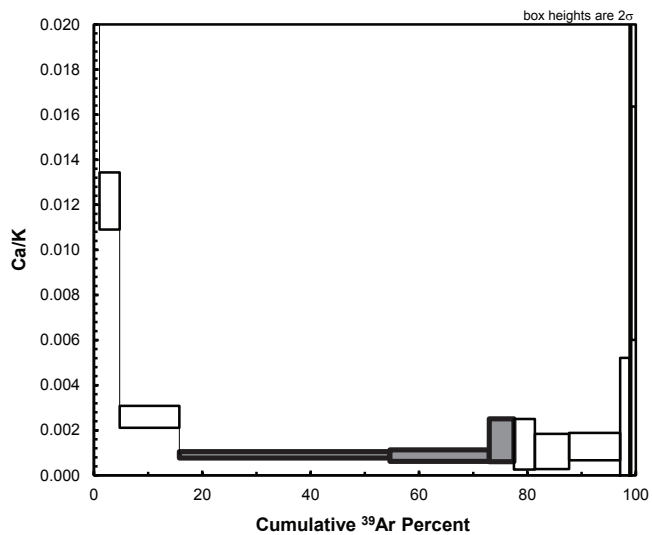

Steps shaded gray were used for age determinations.

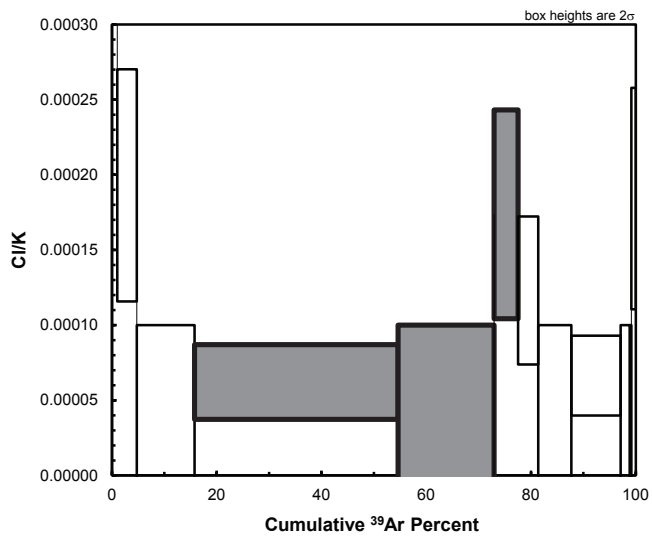

S4: 502067 muscovite 200 microns

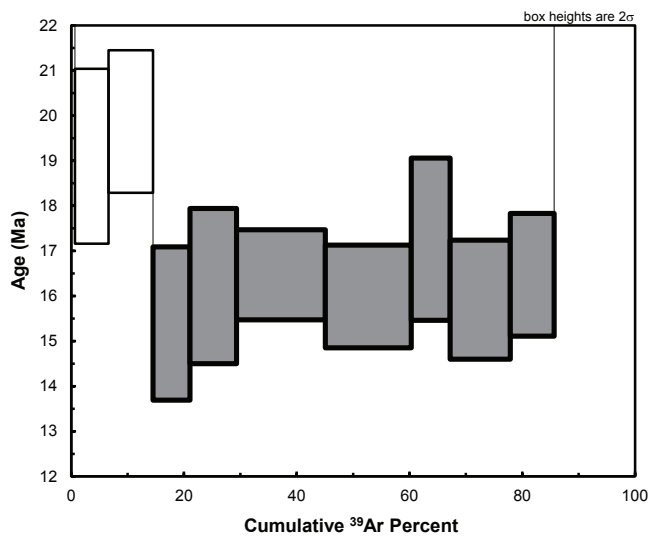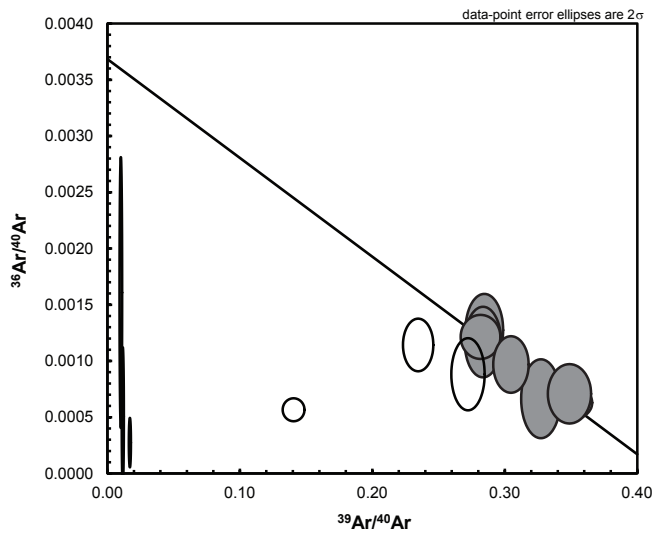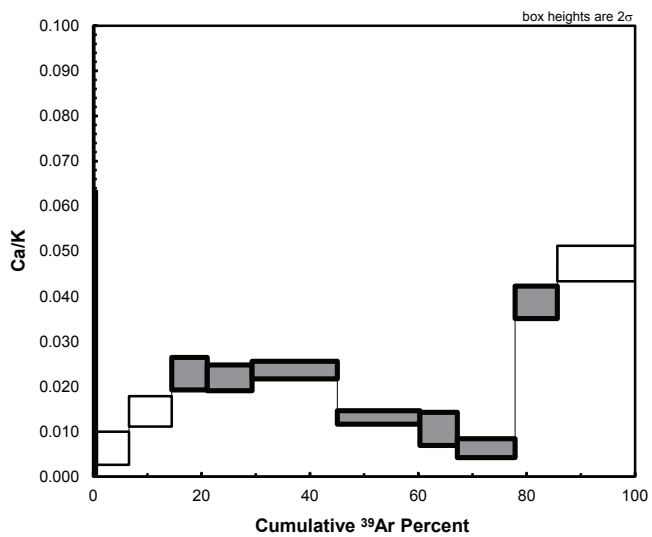

Steps shaded gray were used for age determinations.

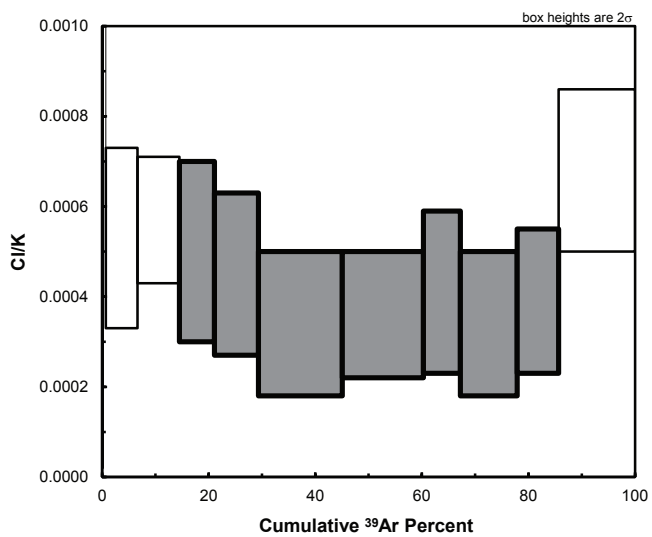



# S5: 502067 muscovite 750 microns

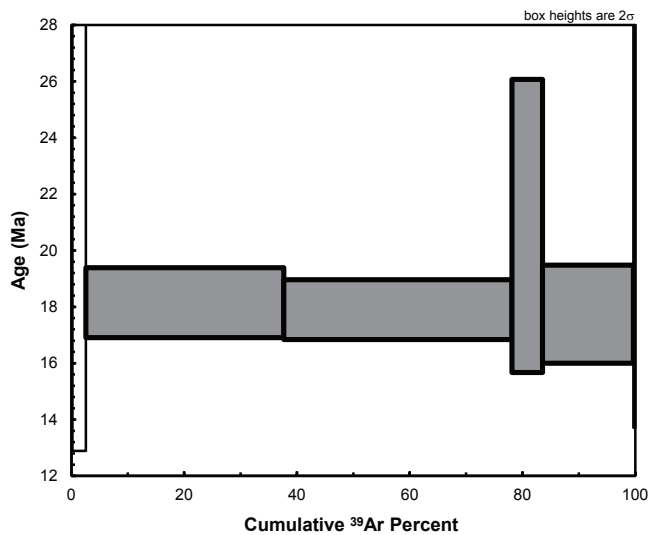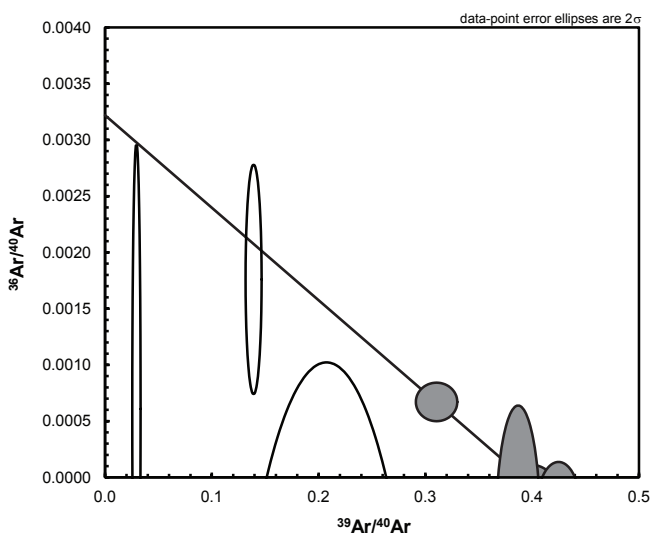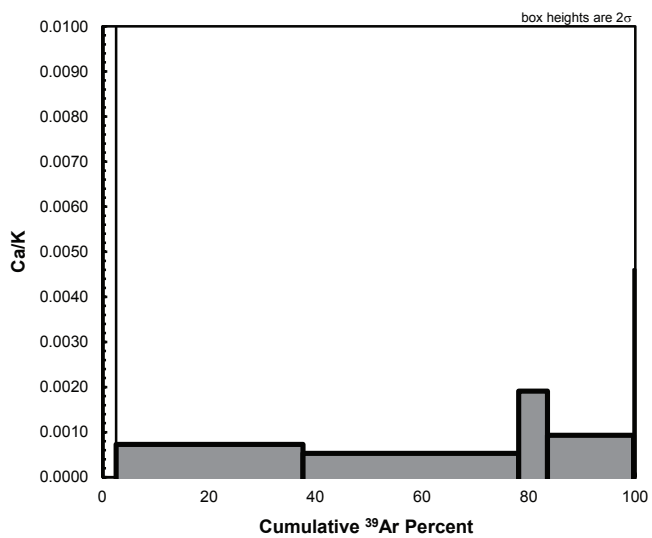

Steps shaded gray were used for age determinations.

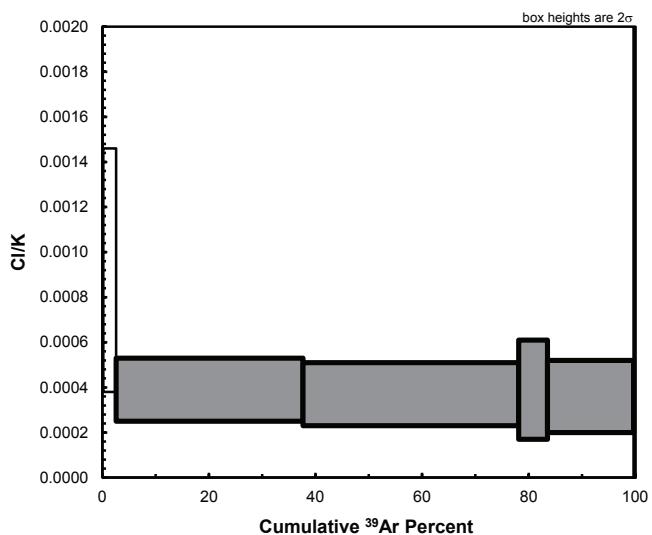

S6: 502067 biotite 200 microns

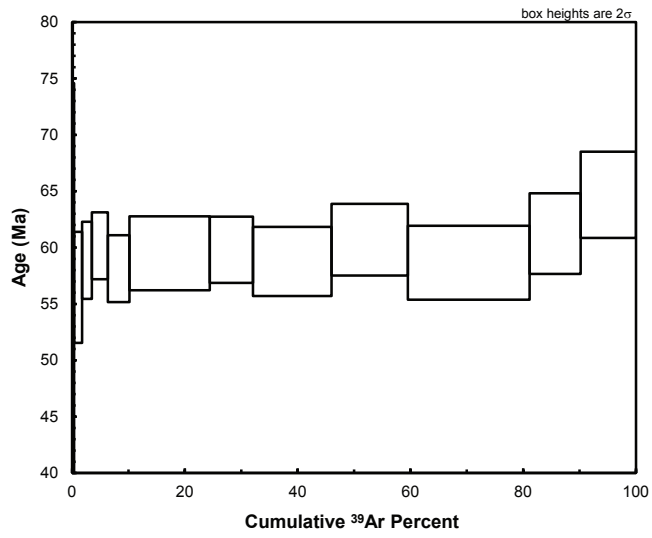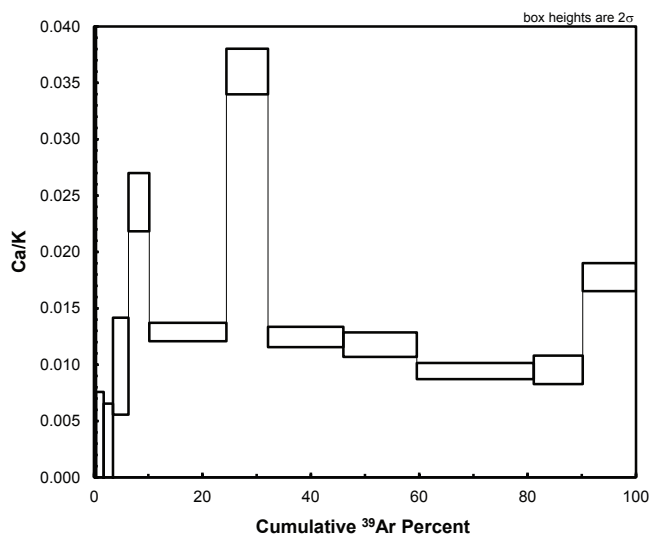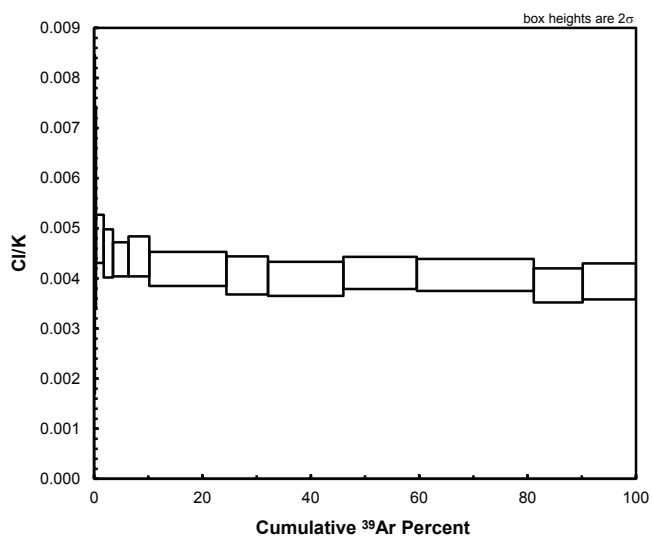

# S7: 406042 muscovite 200 microns

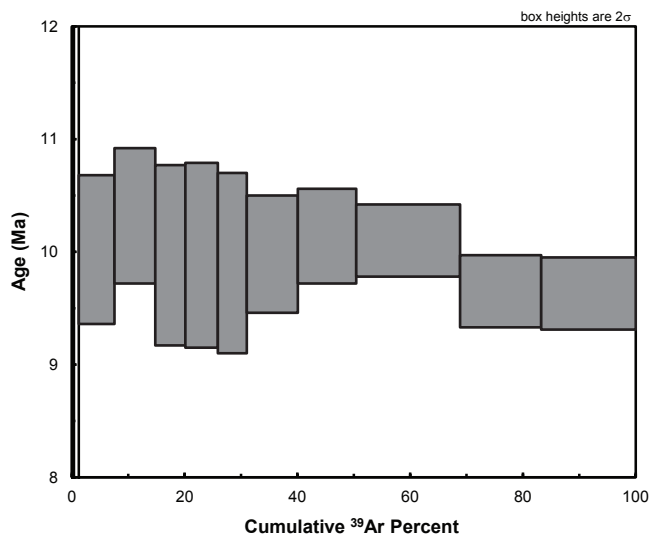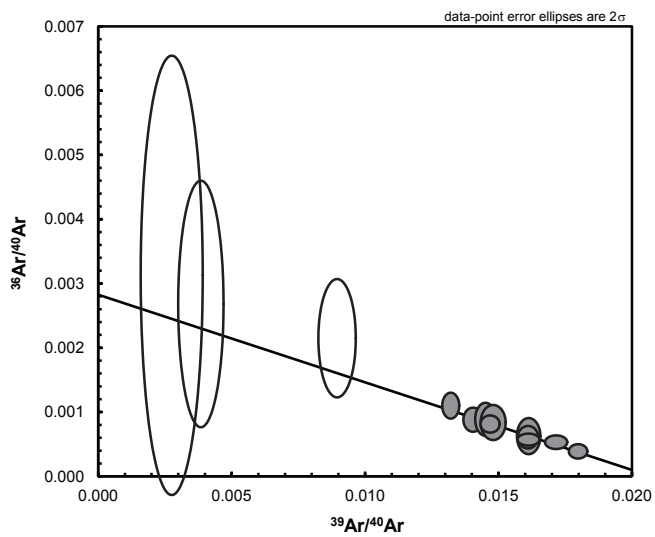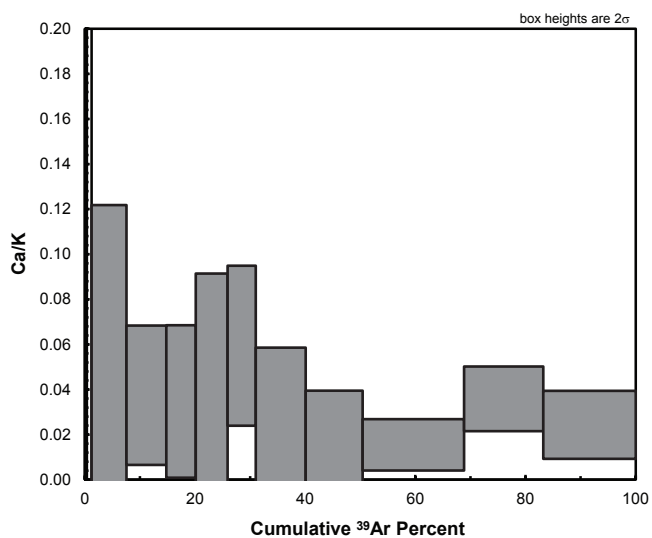

Steps shaded gray were used for age determinations.

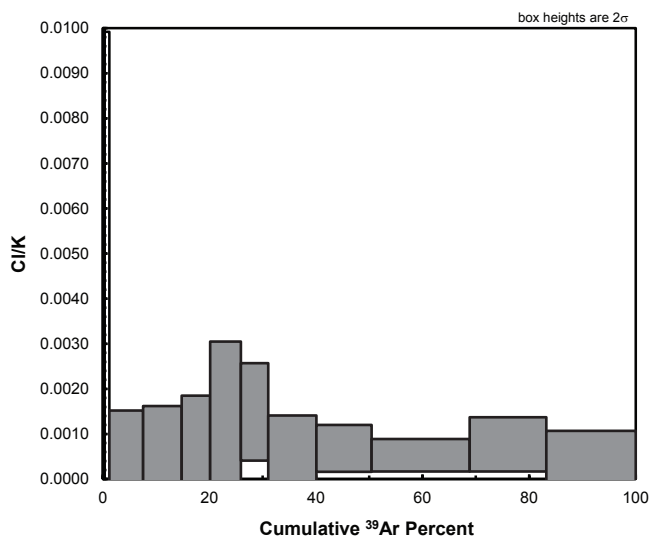

# S8: 406042 muscovite 750 microns

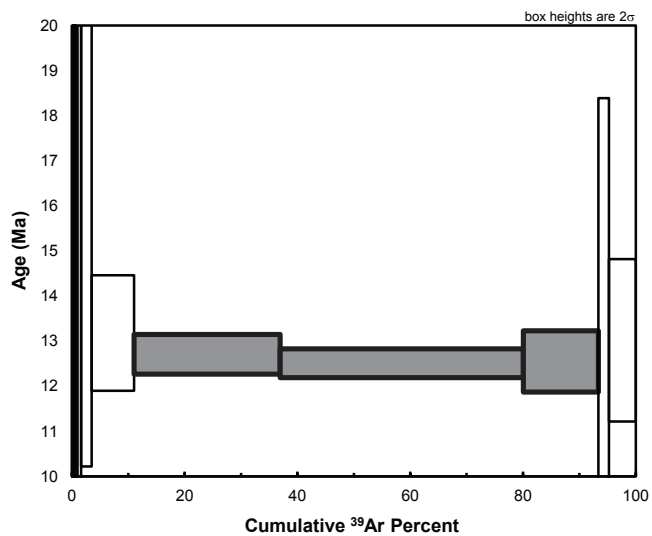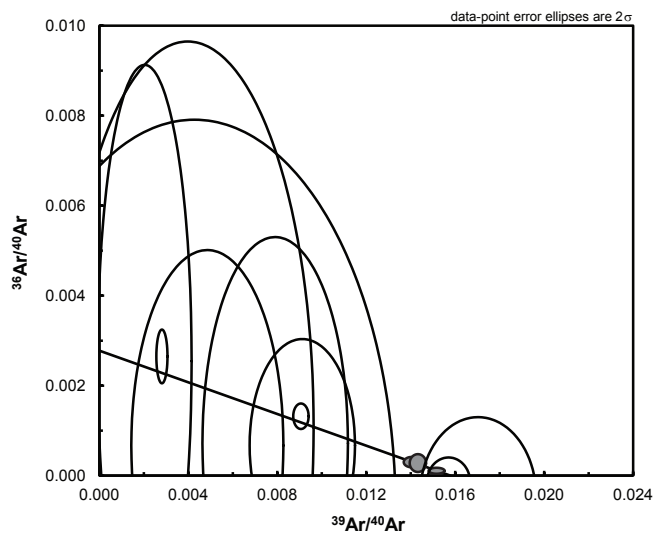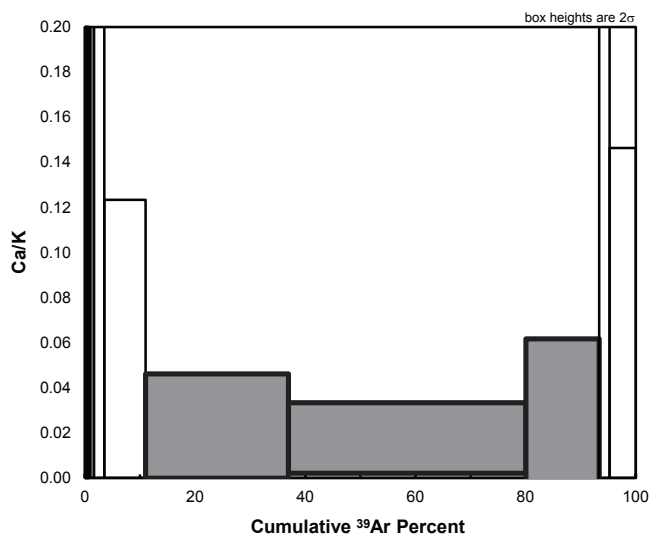

Steps shaded gray were used for age determinations.

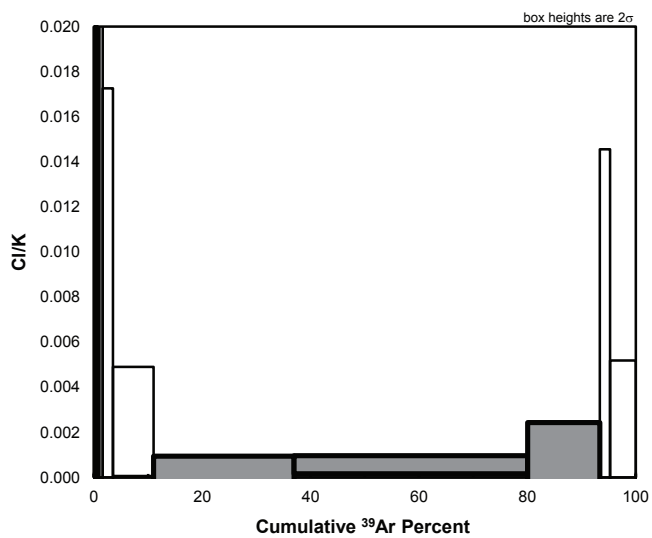

S9: 406042 biotite 200 microns

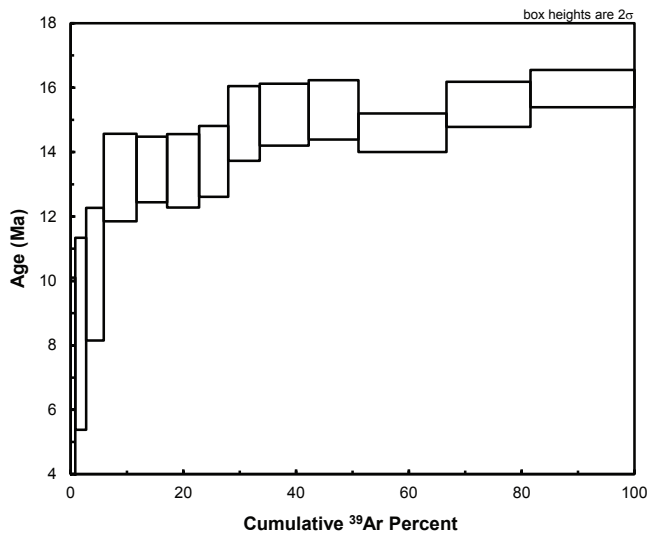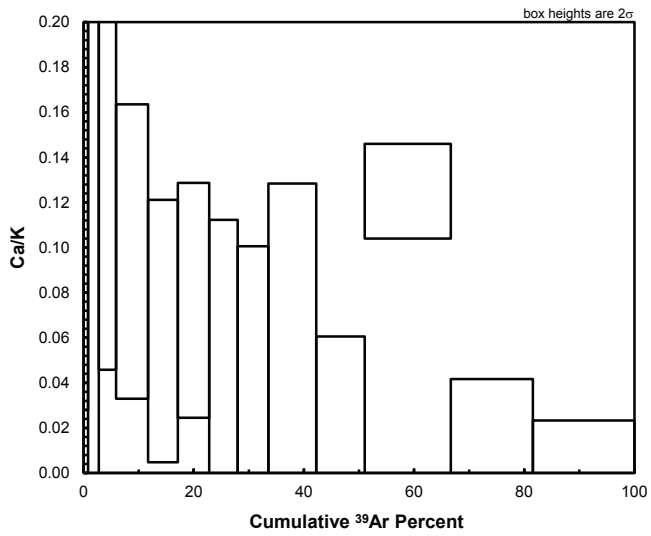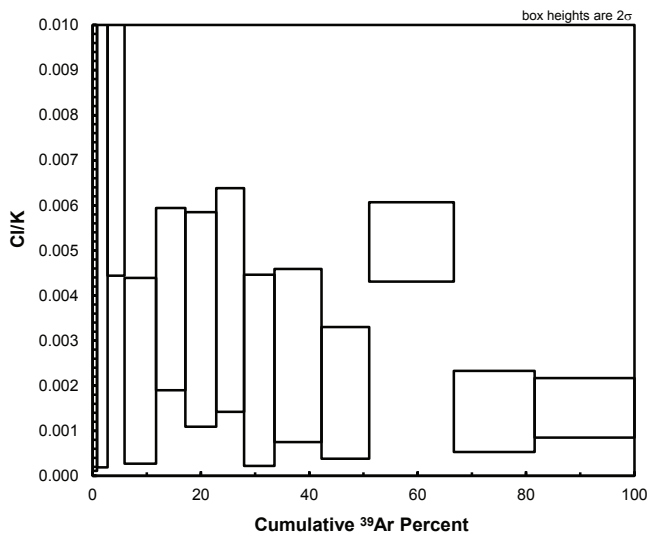



# S10: 502071 muscovite

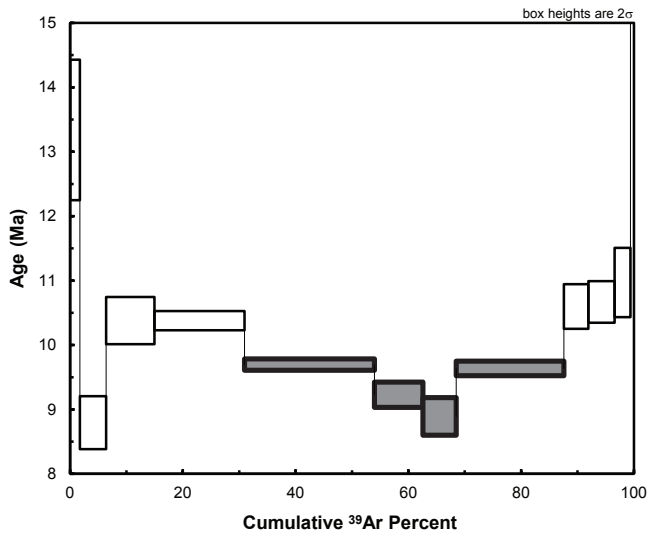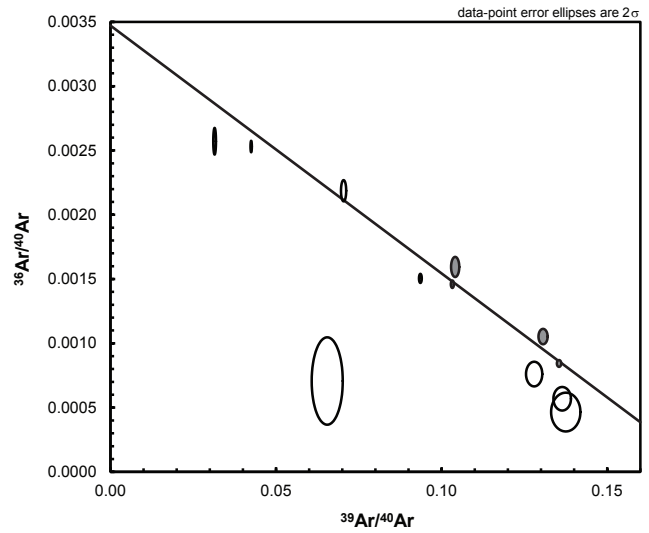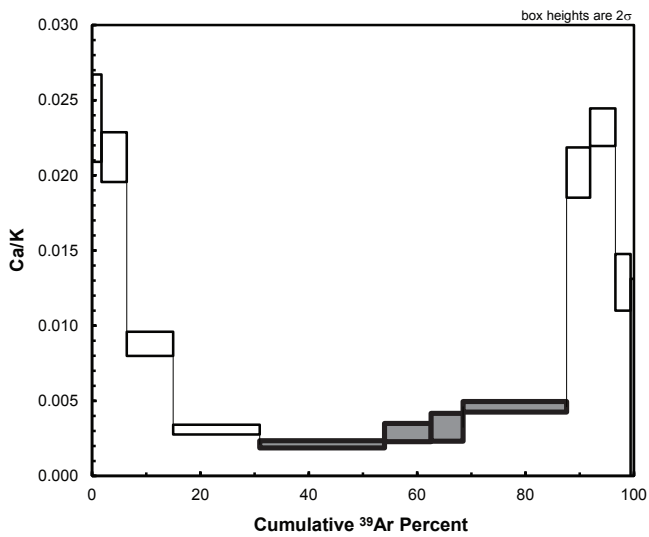

Steps shaded gray were used for age determinations.

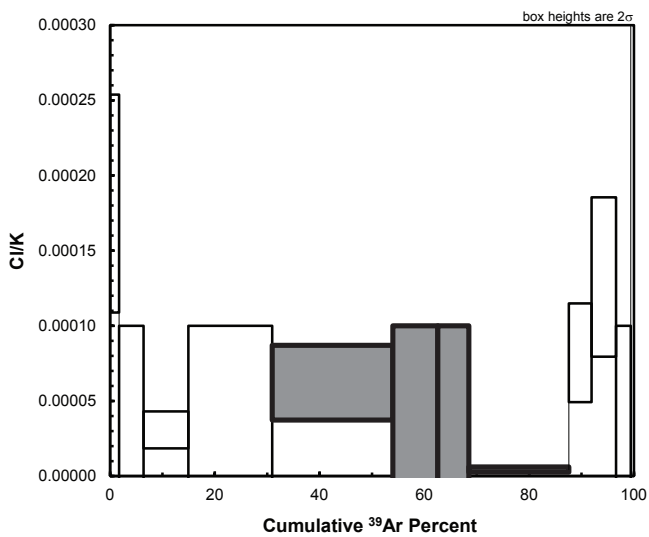

# S11: 502079 muscovite

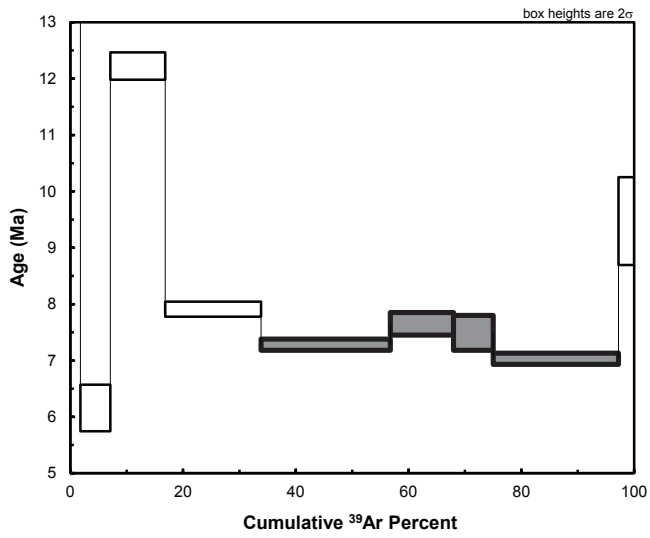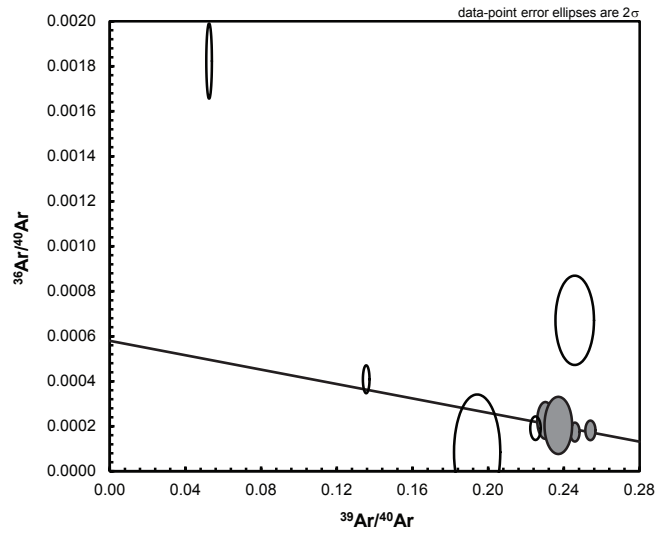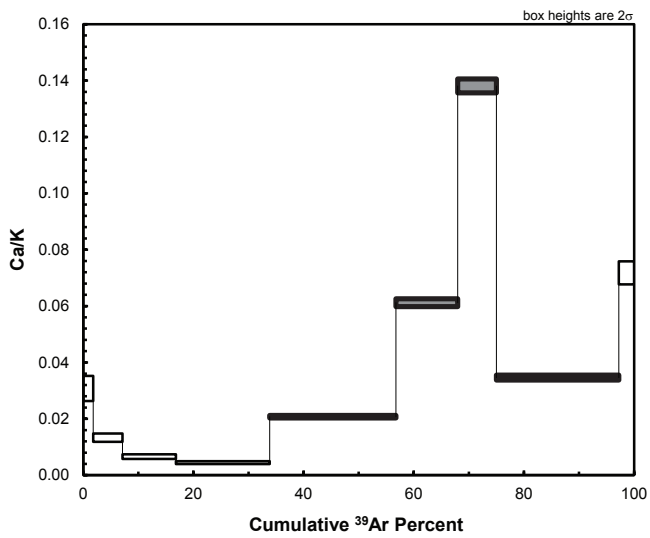

Steps shaded gray were used for age determinations.

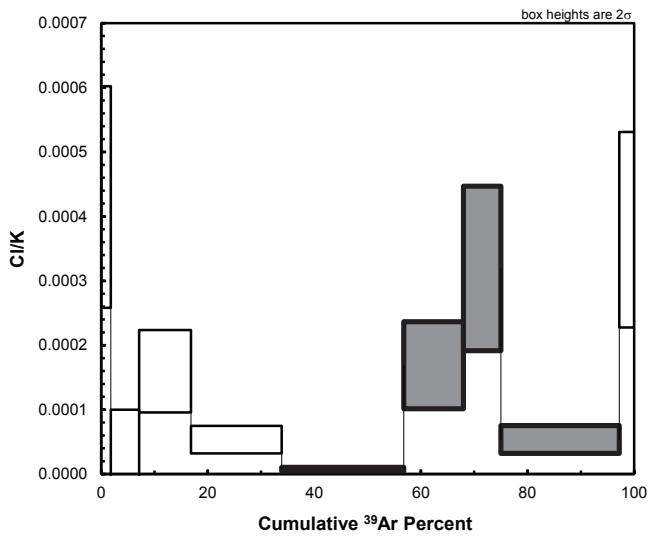

S12: 502102 muscovite

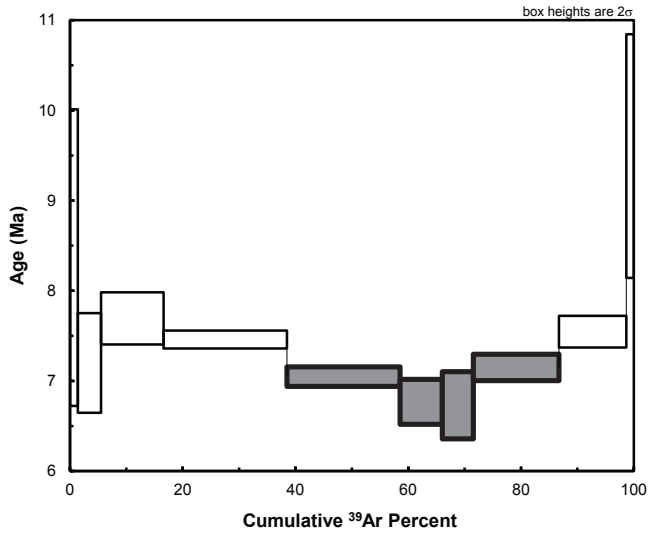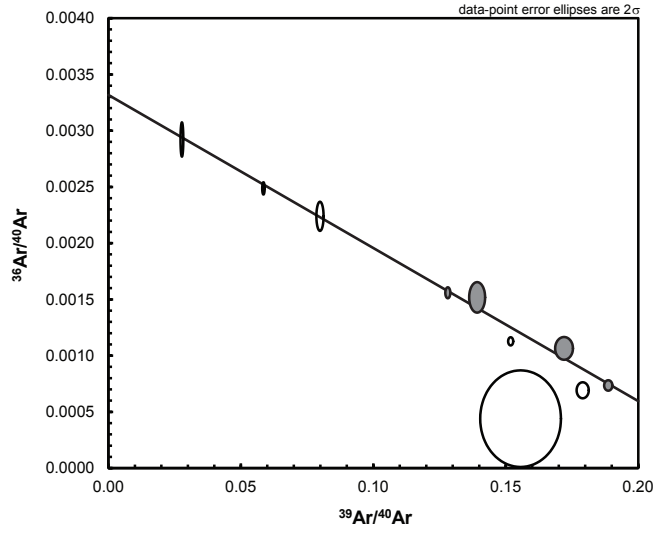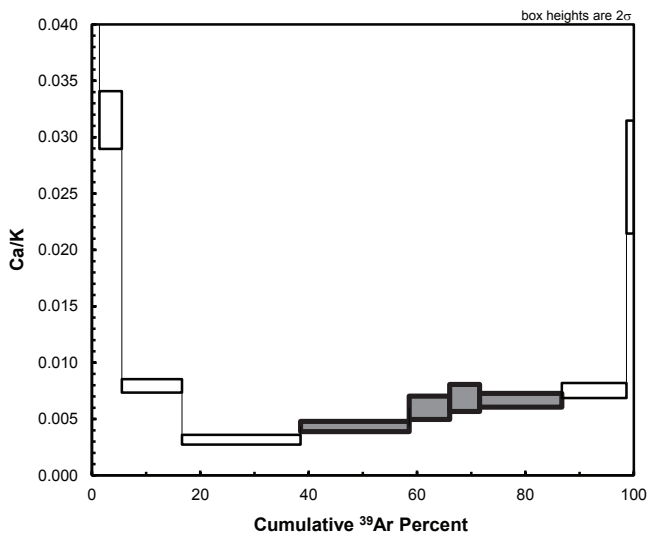

Steps shaded gray were used for age determinations.

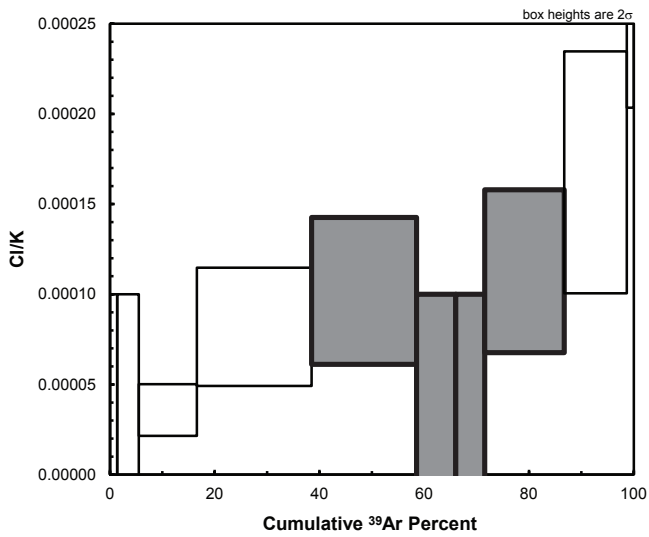

# S13: 502107 muscovite

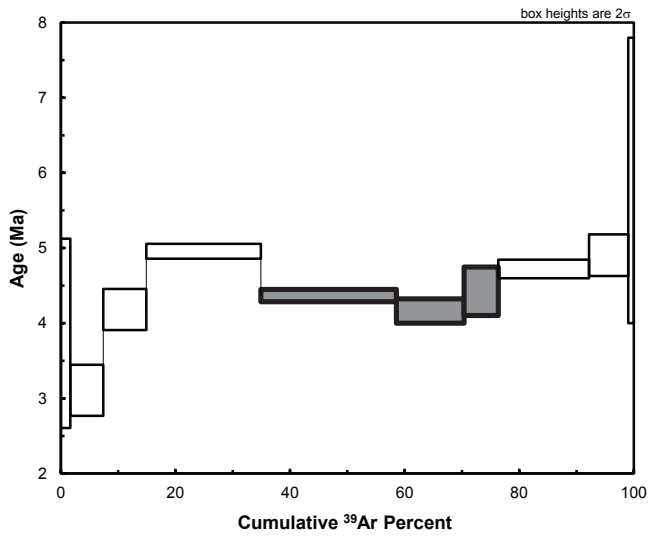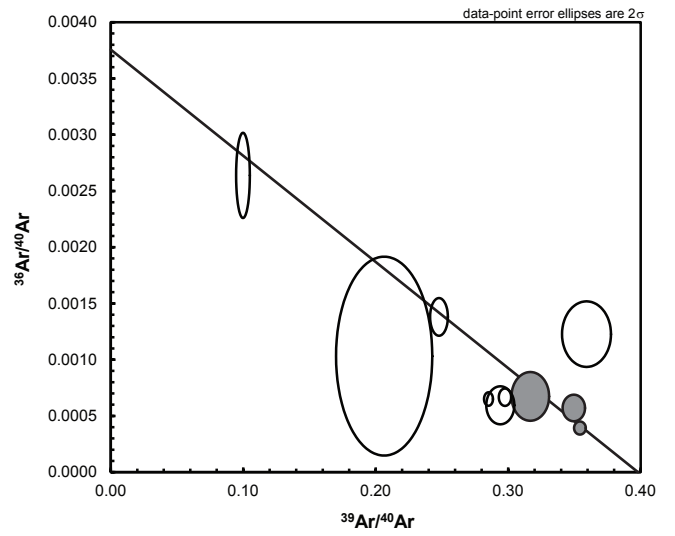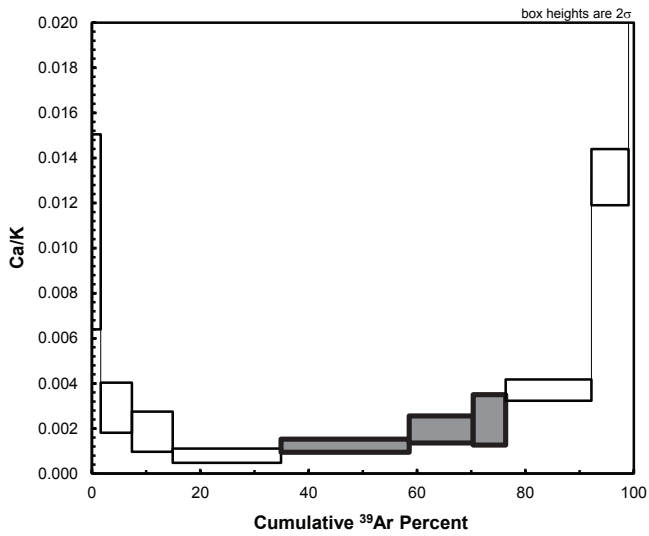

Steps shaded gray were used for age determinations.

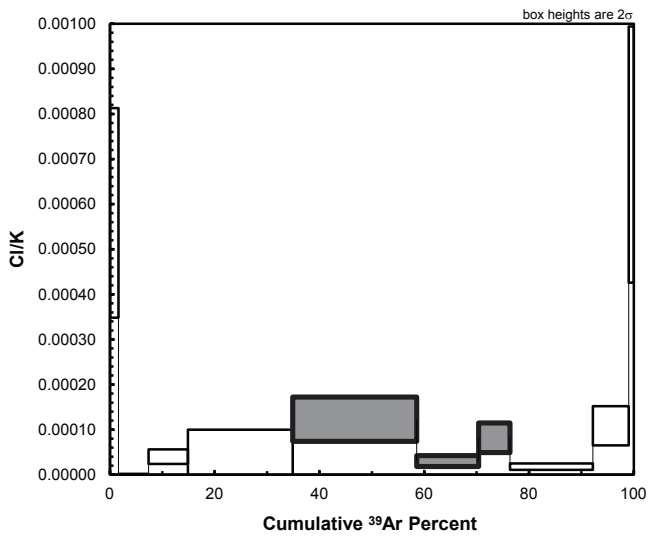

# S14: 502112 muscovite

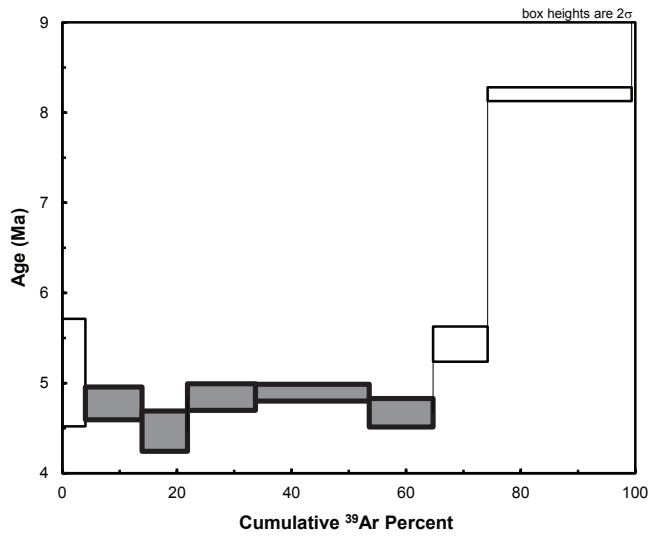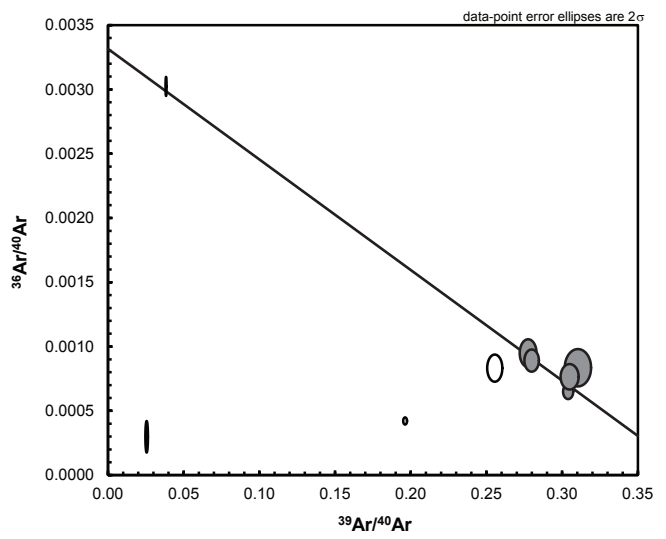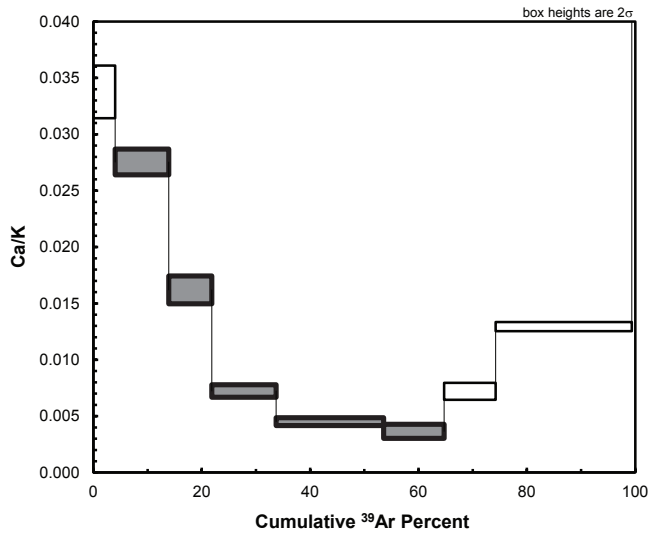

Steps shaded gray were used for age determinations.

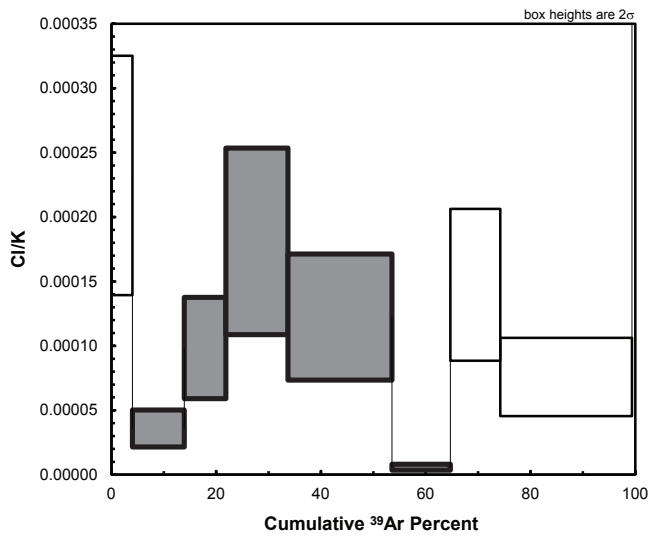



S15: 502121 muscovite

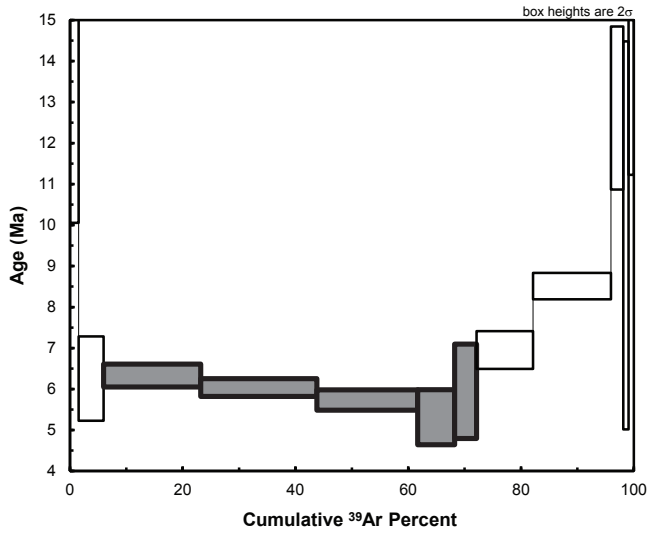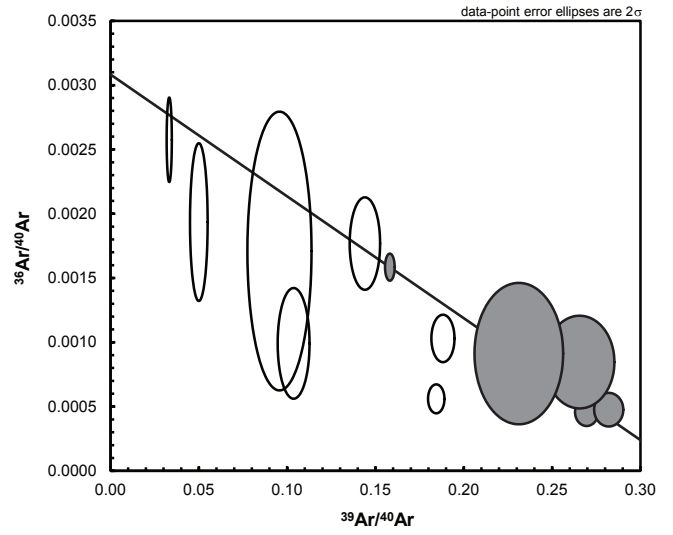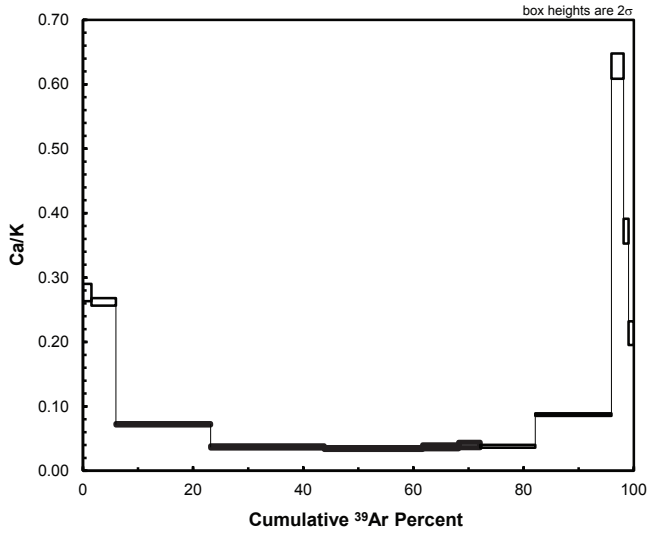

Steps shaded gray were used for age determinations.

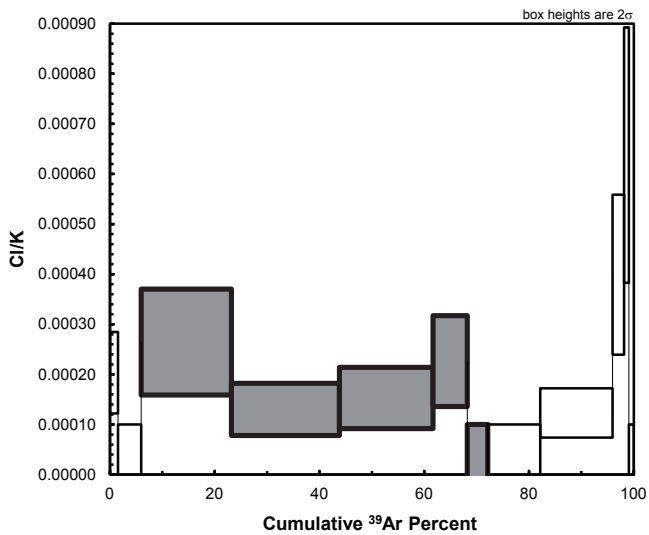

# S16: 502127 muscovite

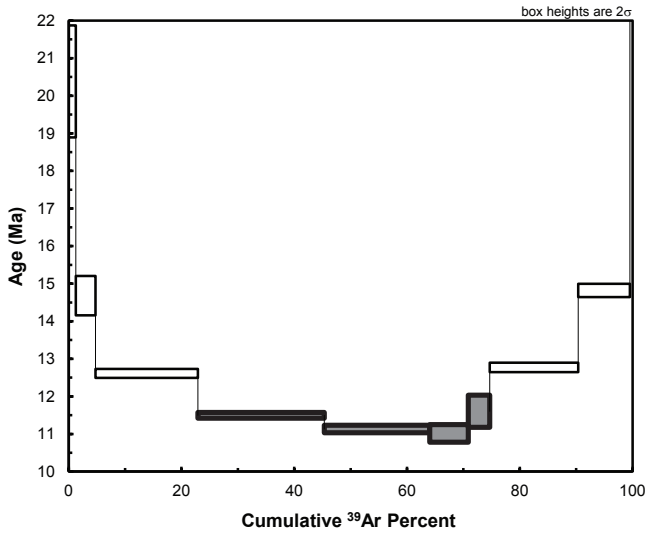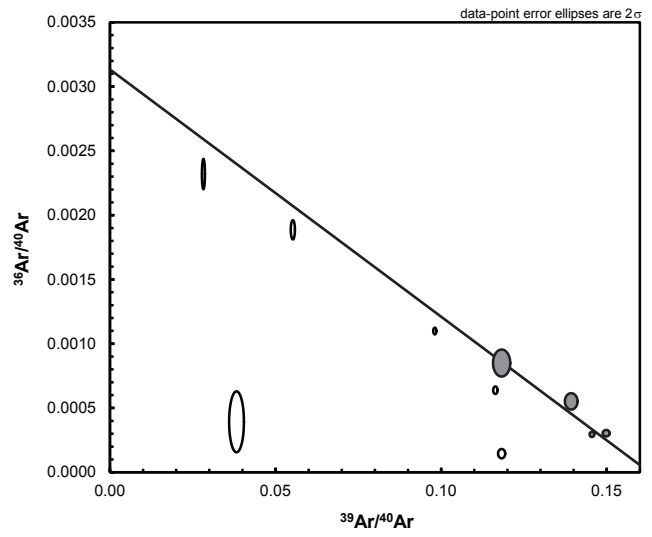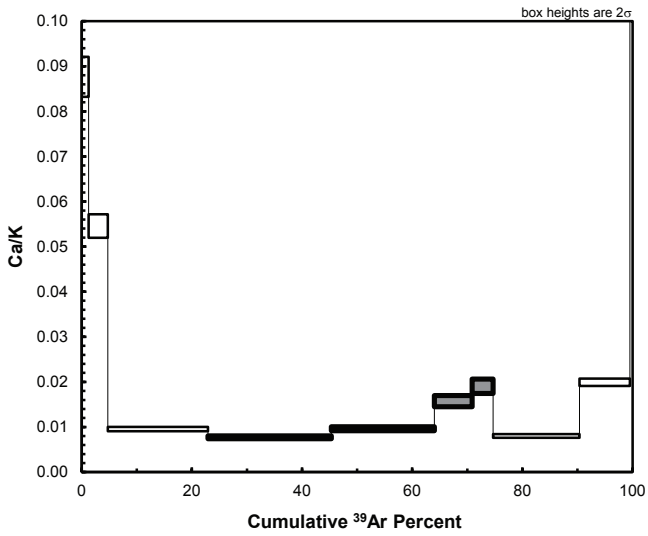

Steps shaded gray were used for age determinations.

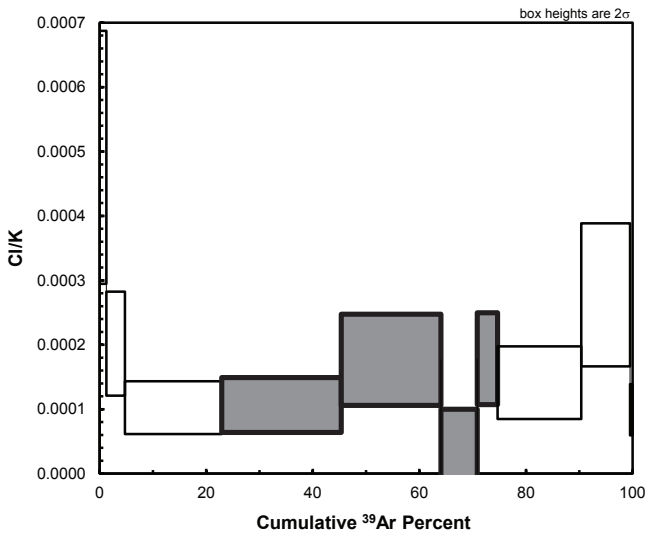

# S17: 502132 muscovite

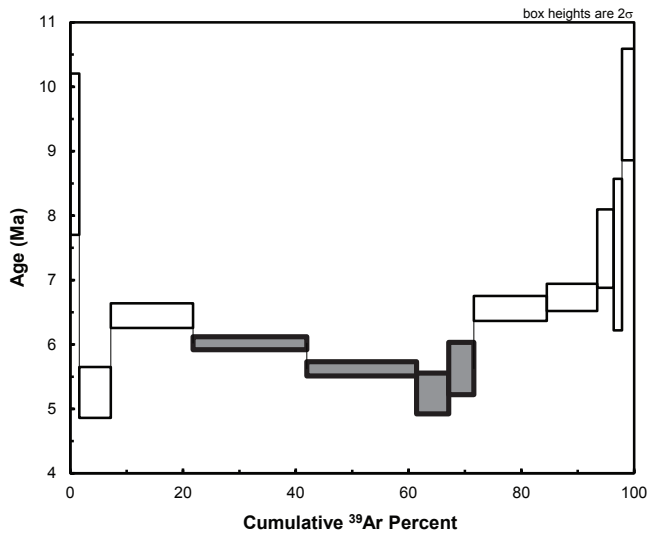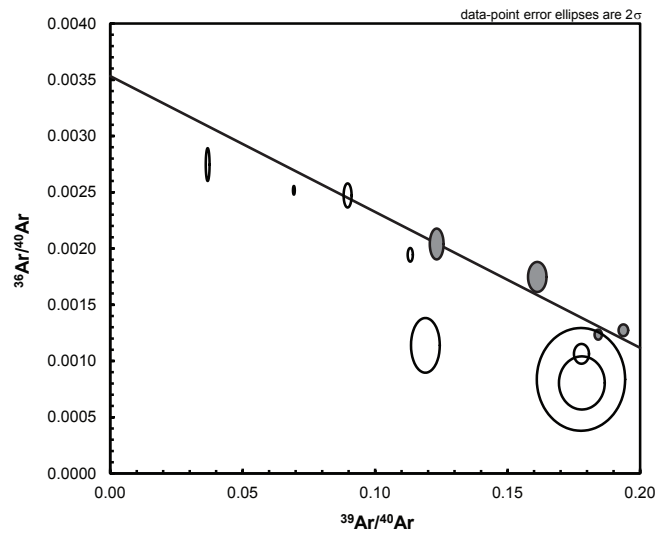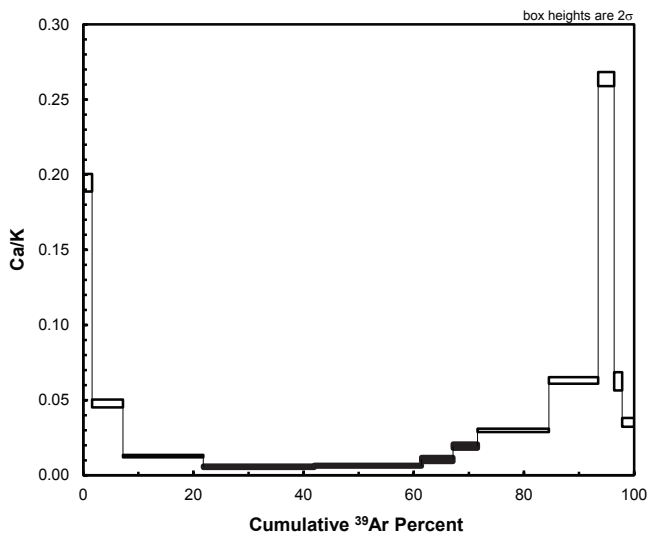

Steps shaded gray were used for age determinations.

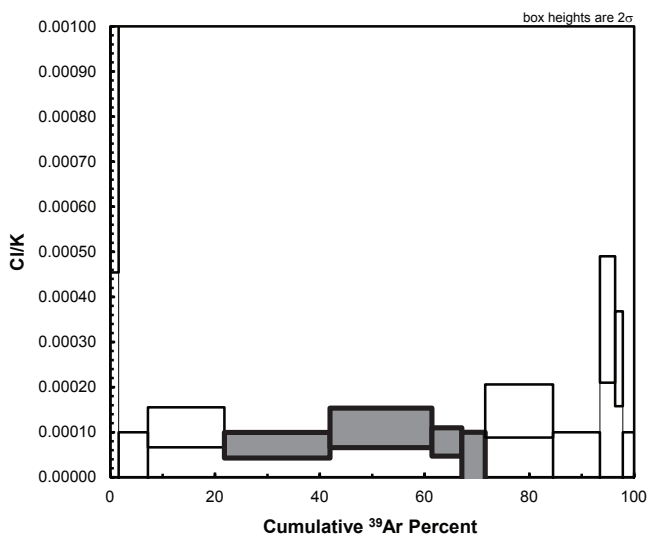

# S18: 502150 muscovite

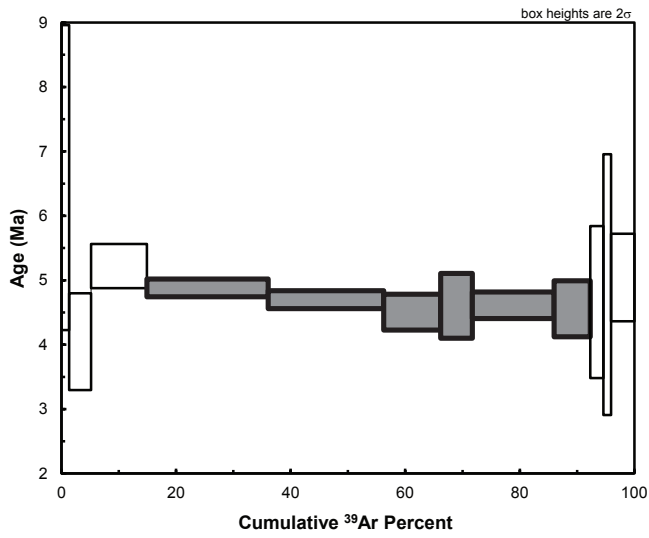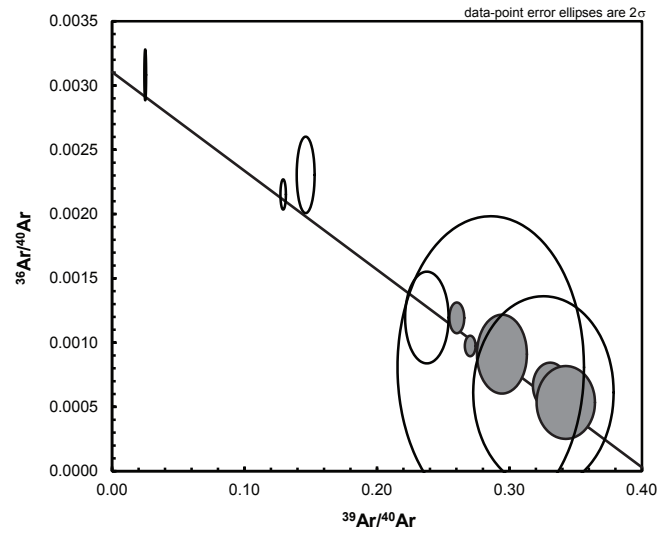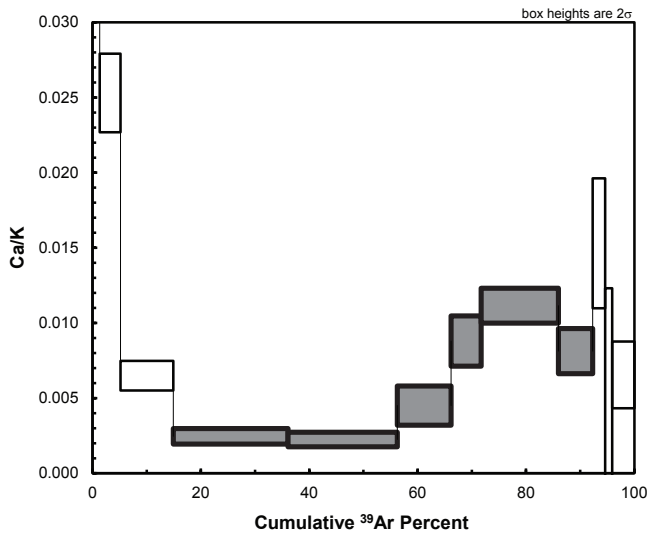

Steps shaded gray were used for age determinations.

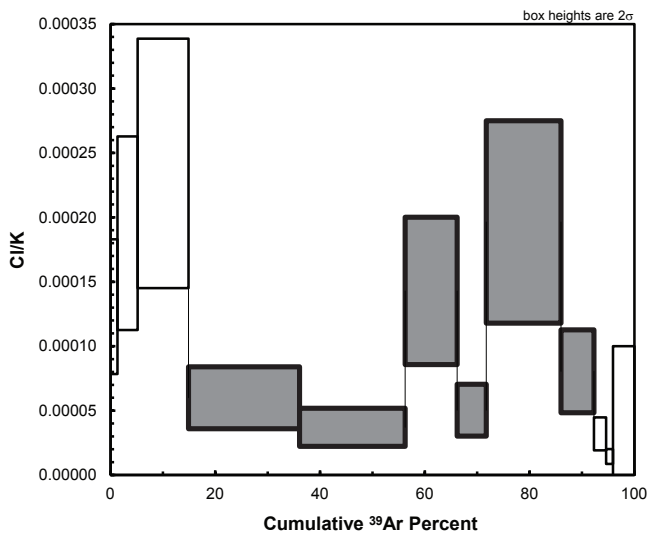

# S19: 502147 muscovite

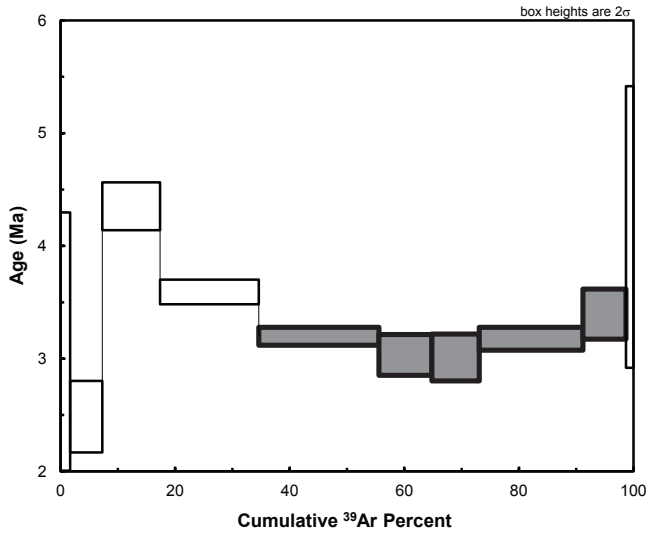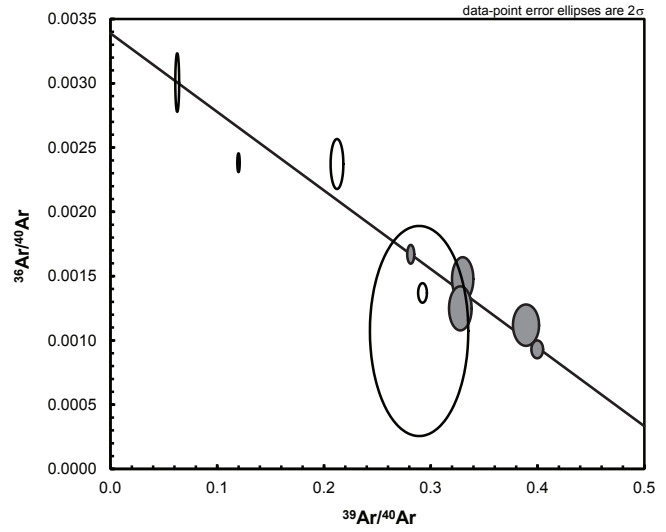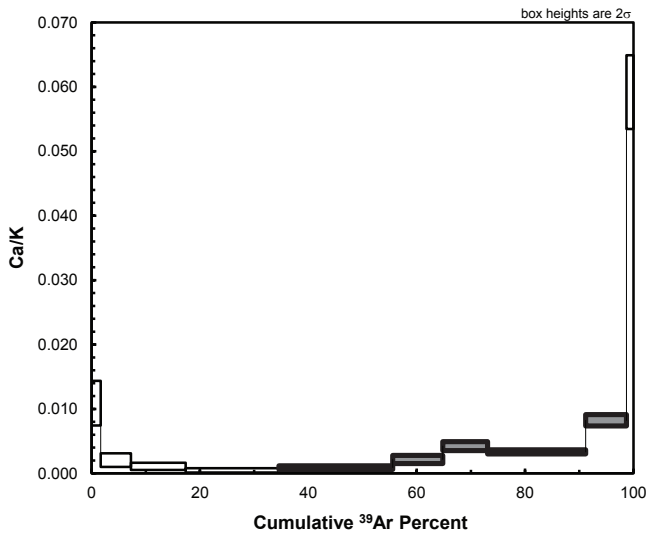

Steps shaded gray were used for age determinations.

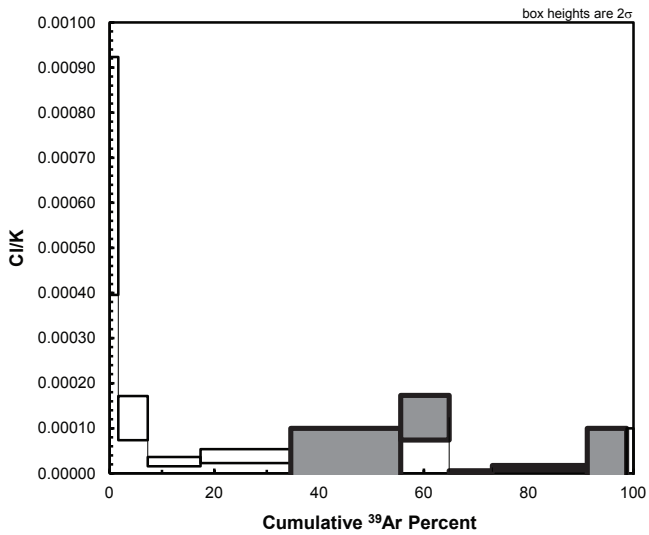

Supplement: Supplementary file 1 [file 1]
